# Supplementary material
Source: MDPI journal article supplement (https://www.mdpi.com/2075-163X/8/10/466)
Supplement: s1 [file s1]

# Supplementary Materials: The Crystal Chemistry of Rathite Based on New Electron-Microprobe Data and Single-Crystal Structure Refinements: The Role of Thallium

Dan Topa and Uwe Kolitsch

Table S1a. Fractional atomic coordinates and displacement parameters (in Å²) for sample rath3.

| Site | Atom  | Sof       | <i>x/a</i>  | <i>y/b</i>  | <i>z/c</i>  | <i>U</i> <sub>ani</sub> | <i>U</i> <sub>11</sub> | <i>U</i> <sub>22</sub> | <i>U</i> <sub>33</sub> | <i>U</i> <sub>23</sub> | <i>U</i> <sub>13</sub> | <i>U</i> <sub>12</sub> |
|------|-------|-----------|-------------|-------------|-------------|-------------------------|------------------------|------------------------|------------------------|------------------------|------------------------|------------------------|
| Pb1  | Pb,Tl | 1         | 0.47592(4)  | 0.75349(5)  | 0.20480(2)  | 0.03124(9)              | 0.02637(16)            | 0.02683(17)            | 0.0400(2)              | −0.00066(14)           | 0.00473(13)            | 0.00276(13)            |
| Pb2  | Pb,Tl | 1         | 0.97818(5)  | 0.75073(7)  | 0.20288(2)  | 0.05211(15)             | 0.0331(2)              | 0.0583(3)              | 0.0595(3)              | 0.0244(2)              | −0.00557(18)           | −0.0197(2)             |
| As1  | As    | 1         | 0.29776(9)  | 0.84994(11) | 0.34079(3)  | 0.01890(15)             | 0.0160(3)              | 0.0219(4)              | 0.0196(3)              | −0.0015(3)             | 0.0054(3)              | 0.0004(3)              |
| As2  | As    | 1         | 0.25091(10) | 0.33117(10) | 0.14814(3)  | 0.02180(16)             | 0.0293(4)              | 0.0161(3)              | 0.0212(4)              | −0.0037(3)             | 0.0078(3)              | −0.0068(3)             |
| Me3a | As    | 0.899(10) | 0.68833(16) | 0.65586(14) | 0.04382(5)  | 0.0442(4)               | 0.0651(8)              | 0.0289(6)              | 0.0466(7)              | −0.0131(4)             | 0.0308(6)              | −0.0204(5)             |
| Me3b | Sb    | 0.101(10) | 0.68833(16) | 0.65586(14) | 0.04382(5)  | 0.0442(4)               | 0.0651(8)              | 0.0289(6)              | 0.0466(7)              | −0.0131(4)             | 0.0308(6)              | −0.0204(5)             |
| As4  | As    | 1         | 0.13942(9)  | 0.66712(11) | 0.05989(3)  | 0.01909(15)             | 0.0163(3)              | 0.0237(4)              | 0.0175(3)              | 0.0024(3)              | 0.0039(3)              | −0.0004(3)             |
| Me5a | As    | 0.546(2)  | 0.4271(2)   | 0.0328(3)   | 0.05071(8)  | 0.0328(3)               | 0.0285(5)              | 0.0456(7)              | 0.0257(7)              | −0.0008(6)             | 0.0087(6)              | 0.0015(5)              |
| Me5b | Ag    | 0.454(2)  | 0.4149(2)   | 0.0160(2)   | 0.07579(7)  | 0.0328(3)               | 0.0285(5)              | 0.0456(7)              | 0.0257(7)              | −0.0008(6)             | 0.0087(6)              | 0.0015(5)              |
| Me6a | Pb    | 0.897(3)  | 0.90488(4)  | 0.08944(5)  | 0.07197(2)  | 0.02801(12)             | 0.02564(17)            | 0.02926(19)            | 0.03097(19)            | 0.00345(14)            | 0.01004(13)            | 0.00848(13)            |
| Me6b | As    | 0.103(3)  | 0.90488(4)  | 0.08944(5)  | 0.07197(2)  | 0.02801(12)             | 0.02564(17)            | 0.02926(19)            | 0.03097(19)            | 0.00345(14)            | 0.01004(13)            | 0.00848(13)            |
| S1   | S     | 1         | 0.2591(2)   | 0.0020(2)   | 0.26401(8)  | 0.0212(4)               | 0.0204(8)              | 0.0159(8)              | 0.0275(9)              | 0.0040(7)              | 0.0053(7)              | 0.0009(6)              |
| S2   | S     | 1         | 0.2506(2)   | 0.4790(2)   | 0.22379(8)  | 0.0191(3)               | 0.0212(8)              | 0.0174(8)              | 0.0190(8)              | −0.0042(6)             | 0.0049(6)              | −0.0004(6)             |
| S3   | S     | 1         | 0.5050(2)   | 0.6783(2)   | 0.32447(8)  | 0.0187(3)               | 0.0163(7)              | 0.0149(8)              | 0.0254(9)              | 0.0012(7)              | 0.0050(6)              | 0.0010(6)              |
| S4   | S     | 1         | 0.9062(2)   | 0.1708(3)   | 0.18100(8)  | 0.0213(4)               | 0.0232(8)              | 0.0187(8)              | 0.0237(9)              | −0.0013(7)             | 0.0084(7)              | 0.0001(7)              |
| S5   | S     | 1         | 0.6941(2)   | 0.8406(2)   | 0.11266(8)  | 0.0200(3)               | 0.0200(8)              | 0.0170(8)              | 0.0225(8)              | −0.0009(7)             | 0.0026(6)              | −0.0001(6)             |
| S6   | S     | 1         | 0.1708(2)   | 0.8801(2)   | 0.12007(8)  | 0.0222(4)               | 0.0228(8)              | 0.0147(8)              | 0.0277(9)              | 0.0017(7)              | 0.0015(7)              | −0.0010(7)             |
| S7   | S     | 1         | 0.3681(2)   | 0.5180(2)   | 0.09864(8)  | 0.0197(3)               | 0.0161(7)              | 0.0190(8)              | 0.0251(9)              | 0.0004(7)              | 0.0068(6)              | −0.0012(6)             |
| S8   | S     | 1         | 0.9583(3)   | 0.5096(3)   | 0.09359(10) | 0.0276(4)               | 0.0239(9)              | 0.0158(9)              | 0.0460(13)             | −0.0008(8)             | 0.0139(9)              | −0.0034(7)             |
| S9   | S     | 1         | 0.5867(3)   | 0.2010(3)   | 0.01128(11) | 0.0338(5)               | 0.0254(10)             | 0.0263(11)             | 0.0489(14)             | 0.0097(10)             | 0.0048(9)              | −0.0008(8)             |
| S10  | S     | 1         | 0.1790(2)   | 0.1840(3)   | 0.00847(8)  | 0.0240(4)               | 0.0239(9)              | 0.0255(10)             | 0.0232(9)              | −0.0007(7)             | 0.0062(7)              | −0.0045(7)             |

**Table S1b.** Fractional atomic coordinates and displacement parameters (in Å<sup>2</sup>) for sample rath4.

| Site | Atom  | Sof       | <i>x/a</i>  | <i>y/b</i>  | <i>z/c</i>  | <i>U</i> <sub>ani</sub> | <i>U</i> <sub>11</sub> | <i>U</i> <sub>22</sub> | <i>U</i> <sub>33</sub> | <i>U</i> <sub>23</sub> | <i>U</i> <sub>13</sub> | <i>U</i> <sub>12</sub> |
|------|-------|-----------|-------------|-------------|-------------|-------------------------|------------------------|------------------------|------------------------|------------------------|------------------------|------------------------|
| Pb1  | Pb,Tl | 1         | 0.47582(5)  | 0.75377(6)  | 0.20495(2)  | 0.0350(2)               | 0.0289(3)              | 0.0349(3)              | 0.0409(3)              | −0.0008(2)             | 0.0058(2)              | 0.0030(2)              |
| Pb2  | Pb,Tl | 1         | 0.97835(6)  | 0.75062(7)  | 0.20306(3)  | 0.0546(2)               | 0.0355(3)              | 0.0630(4)              | 0.0609(4)              | 0.0221(3)              | −0.0025(3)             | −0.0190(3)             |
| As1  | As    | 1         | 0.29825(12) | 0.85045(14) | 0.34117(4)  | 0.0225(3)               | 0.0178(6)              | 0.0300(7)              | 0.0210(6)              | −0.0015(5)             | 0.0070(5)              | 0.0004(5)              |
| As2  | As    | 1         | 0.24901(14) | 0.33249(14) | 0.14765(5)  | 0.0259(3)               | 0.0356(7)              | 0.0230(6)              | 0.0212(7)              | −0.0037(5)             | 0.0108(5)              | −0.0080(5)             |
| Me3a | As    | 0.922(10) | 0.68687(17) | 0.65599(16) | 0.04285(6)  | 0.0464(6)               | 0.0646(10)             | 0.0376(8)              | 0.0445(10)             | −0.0104(6)             | 0.0297(7)              | −0.0167(7)             |
| Me3b | Sb    | 0.078(10) | 0.68687(17) | 0.65599(16) | 0.04285(6)  | 0.0464(6)               | 0.0646(10)             | 0.0376(8)              | 0.0445(10)             | −0.0104(6)             | 0.0297(7)              | −0.0167(7)             |
| As4  | As    | 1         | 0.13898(13) | 0.66813(14) | 0.05958(4)  | 0.0224(3)               | 0.0199(6)              | 0.0300(6)              | 0.0181(6)              | 0.0014(5)              | 0.0054(5)              | −0.0005(5)             |
| Me5a | As    | 0.540(3)  | 0.4279(5)   | 0.0319(5)   | 0.05093(15) | 0.0365(6)               | 0.0328(9)              | 0.0542(11)             | 0.0249(19)             | 0.0009(15)             | 0.0119(15)             | 0.0016(8)              |
| Me5b | Ag    | 0.460(3)  | 0.4148(4)   | 0.0143(4)   | 0.07619(13) | 0.0365(6)               | 0.0328(9)              | 0.0542(11)             | 0.0249(19)             | 0.0009(15)             | 0.0119(15)             | 0.0016(8)              |
| Me6a | Pb    | 0.866(4)  | 0.90434(6)  | 0.08886(7)  | 0.07177(2)  | 0.0332(2)               | 0.0298(3)              | 0.0396(4)              | 0.0321(4)              | 0.0026(2)              | 0.0108(2)              | 0.0105(2)              |
| Me6b | As    | 0.134(4)  | 0.90434(6)  | 0.08886(7)  | 0.07177(2)  | 0.0332(2)               | 0.0298(3)              | 0.0396(4)              | 0.0321(4)              | 0.0026(2)              | 0.0108(2)              | 0.0105(2)              |
| S1   | S     | 1         | 0.2592(3)   | 0.0011(3)   | 0.26397(11) | 0.0240(6)               | 0.0237(15)             | 0.0210(15)             | 0.0279(17)             | 0.0016(13)             | 0.0061(13)             | −0.0003(12)            |
| S2   | S     | 1         | 0.2505(3)   | 0.4798(3)   | 0.22378(11) | 0.0234(6)               | 0.0251(15)             | 0.0271(15)             | 0.0183(15)             | −0.0040(12)            | 0.0051(12)             | −0.0005(12)            |
| S3   | S     | 1         | 0.5053(3)   | 0.6787(3)   | 0.32494(12) | 0.0219(6)               | 0.0167(14)             | 0.0240(15)             | 0.0257(16)             | 0.0010(12)             | 0.0058(12)             | 0.0028(11)             |
| S4   | S     | 1         | 0.9059(3)   | 0.1710(3)   | 0.18045(11) | 0.0245(7)               | 0.0239(15)             | 0.0265(15)             | 0.0245(16)             | −0.0014(13)            | 0.0078(12)             | 0.0008(12)             |
| S5   | S     | 1         | 0.6940(3)   | 0.8400(4)   | 0.11245(11) | 0.0241(7)               | 0.0232(15)             | 0.0265(15)             | 0.0221(16)             | 0.0013(12)             | 0.0026(12)             | 0.0014(12)             |
| S6   | S     | 1         | 0.1702(3)   | 0.8802(3)   | 0.12011(11) | 0.0256(7)               | 0.0274(15)             | 0.0215(15)             | 0.0270(16)             | −0.0003(12)            | 0.0028(13)             | −0.0009(12)            |
| S7   | S     | 1         | 0.3672(3)   | 0.5192(4)   | 0.09844(11) | 0.0236(6)               | 0.0212(14)             | 0.0277(16)             | 0.0234(16)             | −0.0009(12)            | 0.0084(12)             | −0.0010(12)            |
| S8   | S     | 1         | 0.9585(3)   | 0.5088(4)   | 0.09316(13) | 0.0325(7)               | 0.0247(15)             | 0.0225(16)             | 0.054(2)               | 0.0010(14)             | 0.0154(15)             | −0.0028(12)            |
| S9   | S     | 1         | 0.5868(4)   | 0.2014(4)   | 0.01198(14) | 0.0364(8)               | 0.0299(17)             | 0.0338(18)             | 0.045(2)               | 0.0068(15)             | 0.0069(15)             | −0.0038(14)            |
| S10  | S     | 1         | 0.1794(3)   | 0.1835(4)   | 0.00891(12) | 0.0283(7)               | 0.0288(16)             | 0.0337(17)             | 0.0236(17)             | 0.0006(13)             | 0.0080(13)             | −0.0032(13)            |

**Table S1c.** Fractional atomic coordinates and displacement parameters (in Å<sup>2</sup>) for sample rath5 (from Berlepsch et al. [2]).

| Site | Atom  | Sof      | <i>x/a</i>  | <i>y/b</i>  | <i>z/c</i>  | <i>U</i> <sub>ani</sub> |
|------|-------|----------|-------------|-------------|-------------|-------------------------|
| Pb1  | Pb,Tl | 1        | 0.47494(5)  | 0.75704(5)  | 0.20558(2)  | 0.0404(2)               |
| Pb2  | Pb,Tl | 1        | 0.98078(5)  | 0.74922(6)  | 0.20540(2)  | 0.0598(2)               |
| As1  | As    | 1        | 0.29987(10) | 0.85369(12) | 0.34169(4)  | 0.0274(3)               |
| As2  | As    | 1        | 0.24640(12) | 0.33506(12) | 0.14689(45) | 0.0311(2)               |
| Me3a | As    | 0.735(9) | 0.6847(5)   | 0.6605(5)   | 0.0417(2)   | 0.0437(10)              |

|      |    |           |             |             |             |            |
|------|----|-----------|-------------|-------------|-------------|------------|
| Me3b | Sb | 0.265(9)  | 0.6884(12)  | 0.6243(14)  | 0.0380(4)   | 0.066(3)   |
| As4  | As | 1         | 0.13800(10) | 0.67143(12) | 0.05873(4)  | 0.0276(2)  |
| Me5a | As | 0.526(10) | 0.4257(3)   | 0.0252(4)   | 0.0510(3)   | 0.0352(8)  |
| Me5b | Ag | 0.474(10) | 0.4162(3)   | 0.0111(4)   | 0.0772(2)   | 0.0448(10) |
| Me6a | Pb | 0.739(4)  | 0.90270(12) | 0.08494(16) | 0.07178(3)  | 0.0379(3)  |
| Me6b | As | 0.261(4)  | 0.8732(11)  | 0.0374(14)  | 0.0780(4)   | 0.075(4)   |
| S1   | S  | 1         | 0.2564(3)   | 0.9974(3)   | 0.26341(10) | 0.0313(5)  |
| S2   | S  | 1         | 0.2476(3)   | 0.4798(3)   | 0.22331(9)  | 0.0274(5)  |
| S3   | S  | 1         | 0.5068(3)   | 0.6830(3)   | 0.32623(9)  | 0.0262(5)  |
| S4   | S  | 1         | 0.9017(3)   | 0.1712(3)   | 0.17828(10) | 0.0321(5)  |
| S5   | S  | 1         | 0.6976(3)   | 0.8377(3)   | 0.11176(9)  | 0.0291(5)  |
| S6   | S  | 1         | 0.1656(3)   | 0.8802(3)   | 0.12022(10) | 0.0320(5)  |
| S7   | S  | 1         | 0.3641(3)   | 0.5211(3)   | 0.09716(9)  | 0.0289(5)  |
| S8   | S  | 1         | 0.9572(3)   | 0.5086(3)   | 0.08998(12) | 0.0404(6)  |
| S9   | S  | 1         | 0.5888(3)   | 0.1974(3)   | 0.01482(12) | 0.0434(7)  |
| S10  | S  | 1         | 0.1794(3)   | 0.1800(3)   | 0.01016(10) | 0.0321(5)  |

Table S1d. Fractional atomic coordinates and displacement parameters (in Å<sup>2</sup>) for sample rath7.

| Site | Atom  | Sof       | <i>x/a</i>  | <i>y/b</i>  | <i>z/c</i>  | <i>U</i> <sub>ani</sub> | <i>U</i> <sub>11</sub> | <i>U</i> <sub>22</sub> | <i>U</i> <sub>33</sub> | <i>U</i> <sub>23</sub> | <i>U</i> <sub>13</sub> | <i>U</i> <sub>12</sub> |
|------|-------|-----------|-------------|-------------|-------------|-------------------------|------------------------|------------------------|------------------------|------------------------|------------------------|------------------------|
| Pb1  | Pb,Tl | 1         | 0.47431(5)  | 0.76109(5)  | 0.20613(2)  | 0.03837(11)             | 0.03211(18)            | 0.0397(2)              | 0.0429(2)              | −0.00134(16)           | 0.00598(15)            | 0.00546(16)            |
| Pb2  | Pb,Tl | 1         | 0.98215(5)  | 0.74988(6)  | 0.20759(2)  | 0.05762(15)             | 0.0349(2)              | 0.0515(3)              | 0.0814(4)              | 0.0191(2)              | −0.0022(2)             | −0.0155(2)             |
| As1  | As    | 1         | 0.30149(10) | 0.85825(12) | 0.34316(4)  | 0.02781(19)             | 0.0209(4)              | 0.0304(4)              | 0.0335(5)              | −0.0041(4)             | 0.0084(3)              | 0.0026(3)              |
| As2  | As    | 1         | 0.24434(13) | 0.34140(12) | 0.14586(4)  | 0.0311(2)               | 0.0408(5)              | 0.0271(4)              | 0.0278(5)              | −0.0070(3)             | 0.0124(4)              | −0.0114(4)             |
| Me3a | As    | 0.821(7)  | 0.7014(3)   | 0.65391(18) | 0.04057(8)  | 0.0368(4)               | 0.0385(10)             | 0.0305(7)              | 0.0415(9)              | −0.0058(5)             | 0.0075(8)              | −0.0196(6)             |
| Me3b | Sb    | 0.179(7)  | 0.6456(7)   | 0.6448(14)  | 0.0321(2)   | 0.076(3)                | 0.011(2)               | 0.188(9)               | 0.025(3)               | 0.003(3)               | −0.0021(17)            | −0.021(3)              |
| As4  | As    | 1         | 0.13740(10) | 0.67888(12) | 0.05724(4)  | 0.02696(18)             | 0.0210(4)              | 0.0361(5)              | 0.0252(4)              | 0.0013(3)              | 0.0077(3)              | −0.0016(3)             |
| Me5a | As    | 0.531(10) | 0.4266(3)   | 0.0230(3)   | 0.0518(2)   | 0.0329(7)               | 0.0295(9)              | 0.0409(10)             | 0.0300(19)             | 0.0026(9)              | 0.0097(9)              | −0.0061(7)             |
| Me5b | Ag    | 0.469(10) | 0.4147(3)   | 0.0130(3)   | 0.0769(2)   | 0.0460(9)               | 0.0419(11)             | 0.0633(13)             | 0.034(2)               | −0.0015(11)            | 0.0113(10)             | −0.0005(9)             |
| Me6a | Pb    | 0.594(4)  | 0.90183(11) | 0.08429(14) | 0.07001(4)  | 0.0316(3)               | 0.0278(4)              | 0.0362(5)              | 0.0319(4)              | 0.0039(3)              | 0.0089(2)              | 0.0078(3)              |
| Me6b | As    | 0.406(4)  | 0.8755(6)   | 0.0322(7)   | 0.0829(3)   | 0.0561(12)              | 0.064(3)               | 0.039(2)               | 0.073(3)               | −0.0007(18)            | 0.034(2)               | −0.0114(17)            |
| S1   | S     | 1         | 0.2558(3)   | 0.9955(3)   | 0.26374(10) | 0.0315(5)               | 0.0254(10)             | 0.0263(10)             | 0.0437(13)             | 0.0045(9)              | 0.0087(9)              | 0.0026(8)              |

|     |   |   |           |           |             |           |            |            |            |            |            |             |
|-----|---|---|-----------|-----------|-------------|-----------|------------|------------|------------|------------|------------|-------------|
| S2  | S | 1 | 0.2454(3) | 0.4830(3) | 0.22281(9)  | 0.0258(4) | 0.0245(9)  | 0.0278(10) | 0.0258(10) | −0.0077(8) | 0.0063(8)  | −0.0013(8)  |
| S3  | S | 1 | 0.5086(2) | 0.6867(3) | 0.32823(10) | 0.0273(4) | 0.0189(9)  | 0.0253(9)  | 0.0381(12) | 0.0005(8)  | 0.0065(8)  | 0.0037(7)   |
| S4  | S | 1 | 0.8992(3) | 0.1720(3) | 0.17540(10) | 0.0321(5) | 0.0321(11) | 0.0288(10) | 0.0378(12) | −0.0010(9) | 0.0123(9)  | 0.0011(9)   |
| S5  | S | 1 | 0.6995(3) | 0.8368(3) | 0.11015(9)  | 0.0254(4) | 0.0245(9)  | 0.0236(9)  | 0.0265(10) | 0.0009(7)  | 0.0004(8)  | −0.0009(7)  |
| S6  | S | 1 | 0.1619(3) | 0.8828(3) | 0.12065(10) | 0.0337(5) | 0.0458(13) | 0.0227(10) | 0.0319(12) | 0.0029(8)  | 0.0053(10) | −0.0028(9)  |
| S7  | S | 1 | 0.3615(3) | 0.5276(3) | 0.09584(9)  | 0.0283(4) | 0.0200(9)  | 0.0361(11) | 0.0303(11) | −0.0005(8) | 0.0087(8)  | −0.0041(8)  |
| S8  | S | 1 | 0.9567(3) | 0.5110(3) | 0.08664(15) | 0.0460(7) | 0.0303(12) | 0.0229(10) | 0.091(2)   | 0.0022(12) | 0.0284(14) | −0.0010(9)  |
| S9  | S | 1 | 0.5878(3) | 0.1959(3) | 0.01676(13) | 0.0432(6) | 0.0292(12) | 0.0330(12) | 0.0687(19) | 0.0035(12) | 0.0126(12) | −0.0034(10) |
| S10 | S | 1 | 0.1810(3) | 0.1794(3) | 0.01204(10) | 0.0306(4) | 0.0281(10) | 0.0338(11) | 0.0307(11) | 0.0006(9)  | 0.0079(8)  | −0.0055(9)  |

Table S2a. Bond lengths in sample rath3.

| Pb1– |          | Pb2– |          | As1– |          | As2– |          | As4– |          |
|------|----------|------|----------|------|----------|------|----------|------|----------|
| S2   | 2.990(2) | S4   | 2.971(2) | S4   | 2.226(2) | S2   | 2.234(2) | S6   | 2.249(2) |
| S1   | 2.997(2) | S1   | 3.039(2) | S1   | 2.247(2) | S7   | 2.277(2) | S8   | 2.262(2) |
| S3   | 3.032(2) | S6   | 3.052(2) | S3   | 2.318(2) | S3   | 2.387(2) | S7   | 2.325(2) |
| S6   | 3.194(2) | S5   | 3.072(2) | S8   | 3.219(2) | S8   | 2.963(2) | S10  | 3.150(2) |
| S2   | 3.202(2) | S2   | 3.130(2) | S7   | 3.245(2) | S4   | 3.425(2) | S9   | 3.350(3) |
| S1   | 3.238(2) | S1   | 3.263(2) |      |          |      |          |      |          |
| S7   | 3.246(2) | S8   | 3.325(2) |      |          |      |          |      |          |
| S5   | 3.294(2) | S4   | 3.408(2) |      |          |      |          |      |          |
| S3   | 3.454(2) | S2   | 3.428(2) |      |          |      |          |      |          |
| As3– |          | As5– |          | Ag5– |          | Pb6– |          |      |          |
| S5   | 2.260(2) | S9   | 2.255(3) | S10  | 2.718(3) | S4   | 2.814(2) |      |          |
| S10  | 2.269(2) | S9   | 2.409(4) | S6   | 2.744(3) | S6   | 2.879(2) |      |          |
| S8   | 2.663(3) | S10  | 2.483(3) | S5   | 2.754(3) | S10  | 2.959(2) |      |          |
| S9   | 2.730(3) | S5   | 2.927(3) | S9   | 2.781(3) | S5   | 2.966(2) |      |          |
| S7   | 3.442(2) | S6   | 3.260(3) | S9   | 2.788(3) | S9   | 2.978(2) |      |          |
|      |          |      |          | S3   | 2.789(3) | S10  | 3.144(2) |      |          |
|      |          |      |          |      |          | S8   | 3.388(2) |      |          |

**Table S2b.** Bond lengths in sample rath4.

| <b>Pb1–</b> |          | <b>Pb2–</b> |          | <b>As1–</b> |          | <b>As2–</b> |          | <b>As4–</b> |          |
|-------------|----------|-------------|----------|-------------|----------|-------------|----------|-------------|----------|
| S2          | 2.987(3) | S4          | 2.972(3) | S4          | 2.228(3) | S2          | 2.236(3) | S6          | 2.247(3) |
| S1          | 3.003(3) | S1          | 3.044(3) | S1          | 2.246(3) | S7          | 2.275(3) | S8          | 2.264(3) |
| S3          | 3.032(3) | S6          | 3.047(3) | S3          | 2.316(3) | S3          | 2.402(3) | S7          | 2.322(3) |
| S6          | 3.195(3) | S5          | 3.075(3) | S8          | 3.218(3) | S8          | 2.940(3) | S10         | 3.148(3) |
| S2          | 3.202(3) | S2          | 3.124(3) | S7          | 3.247(3) | S4          | 3.416(3) | S9          | 3.353(3) |
| S1          | 3.227(3) | S1          | 3.256(3) |             |          |             |          |             |          |
| S7          | 3.245(3) | S8          | 3.335(3) |             |          |             |          |             |          |
| S5          | 3.296(3) | S4          | 3.415(3) |             |          |             |          |             |          |
| S3          | 3.459(3) | S2          | 3.427(3) |             |          |             |          |             |          |
| <b>As3–</b> |          | <b>As5–</b> |          | <b>Ag5–</b> |          | <b>Pb6–</b> |          |             |          |
| S10         | 2.266(3) | S9          | 2.249(5) | S10         | 2.717(4) | S4          | 2.800(3) |             |          |
| S5          | 2.266(3) | S9          | 2.418(5) | S6          | 2.737(4) | S6          | 2.877(3) |             |          |
| S8          | 2.680(3) | S10         | 2.484(5) | S5          | 2.746(4) | S10         | 2.953(3) |             |          |
| S9          | 2.715(4) | S5          | 2.915(5) | S3          | 2.772(4) | S5          | 2.963(3) |             |          |
| S7          | 3.445(3) | S6          | 3.261(5) | S9          | 2.790(4) | S9          | 2.967(3) |             |          |
|             |          |             |          | S9          | 2.792(5) | S10         | 3.139(3) |             |          |
|             |          |             |          |             |          | S8          | 3.388(3) |             |          |

**Table S2c.** Bond lengths in sample rath5 (recalculated from Berlepsch et al. [2]).

| <b>Pb1–</b> |          | <b>Pb2–</b> |          | <b>As1–</b> |          | <b>As2–</b> |          | <b>As4–</b> |          |
|-------------|----------|-------------|----------|-------------|----------|-------------|----------|-------------|----------|
| S2          | 3.022(3) | S4          | 2.973(2) | S4          | 2.232(3) | S2          | 2.238(3) | S6          | 2.253(3) |
| S3          | 3.050(3) | S1          | 3.048(3) | S1          | 2.246(3) | S7          | 2.285(3) | S8          | 2.260(3) |
| S1          | 3.072(3) | S6          | 3.063(3) | S3          | 2.312(2) | S3          | 2.407(2) | S7          | 2.317(3) |
| S1          | 3.198(3) | S2          | 3.094(3) | S8          | 3.261(3) | S8          | 2.948(3) | S10         | 3.152(3) |
| S2          | 3.215(3) | S5          | 3.117(3) | S7          | 3.265(3) | S4          | 3.429(3) | S9          | 3.389(3) |
| S6          | 3.221(2) | S1          | 3.202(3) |             |          |             |          |             |          |
| S7          | 3.300(2) | S2          | 3.412(3) |             |          |             |          |             |          |
| S5          | 3.347(3) | S8          | 3.451(3) |             |          |             |          |             |          |
| S3          | 3.497(2) | S4          | 3.472(2) |             |          |             |          |             |          |

| As3– |          | Sb3– |           | As5– |          | Ag5– |          | Pb6– |          | As6– |           |
|------|----------|------|-----------|------|----------|------|----------|------|----------|------|-----------|
| S5   | 2.243(5) | S10  | 2.380(11) | S9   | 2.258(5) | S10  | 2.727(4) | S4   | 2.764(3) | S5   | 2.439(11) |
| S10  | 2.281(5) | S5   | 2.506(11) | S9   | 2.413(6) | S3   | 2.757(5) | S9   | 2.850(3) | S4   | 2.705(11) |
| S8   | 2.693(5) | S8   | 2.581(10) | S10  | 2.481(4) | S5   | 2.758(4) | S5   | 2.923(3) | S10  | 2.782(11) |
| S9   | 2.734(5) | S9   | 2.857(10) | S5   | 2.931(4) | S6   | 2.765(5) | S10  | 2.929(3) | S9   | 2.808(10) |
| S7   | 3.465(5) | S7   | 3.464(11) | S6   | 3.266(6) | S9   | 2.768(5) | S8   | 2.941(3) | S8   | 2.926(10) |
|      |          | S9   | 3.528(11) |      |          | S9   | 2.841(5) | S8   | 3.138(3) |      |           |
|      |          |      |           |      |          |      |          | S8   | 3.427(3) |      |           |

Table S2d. Bond lengths in sample rath7.

| Pb1– |          | Pb2– |          | As1– |          | As2– |          | As4– |          |      |          |
|------|----------|------|----------|------|----------|------|----------|------|----------|------|----------|
| S2   | 3.025(2) | S4   | 2.981(3) | S1   | 2.238(3) | S2   | 2.231(2) | S6   | 2.253(3) |      |          |
| S3   | 3.074(2) | S1   | 3.038(2) | S4   | 2.241(3) | S7   | 2.284(2) | S8   | 2.258(3) |      |          |
| S1   | 3.106(2) | S2   | 3.055(2) | S3   | 2.311(2) | S3   | 2.414(2) | S7   | 2.306(3) |      |          |
| S1   | 3.160(2) | S6   | 3.068(3) | S7   | 3.273(3) | S8   | 2.940(3) | S10  | 3.138(3) |      |          |
| S2   | 3.222(2) | S1   | 3.159(3) | S8   | 3.285(3) | S4   | 3.427(3) | S9   | 3.386(3) |      |          |
| S6   | 3.232(3) | S5   | 3.165(2) |      |          |      |          |      |          |      |          |
| S7   | 3.319(2) | S2   | 3.384(2) |      |          |      |          |      |          |      |          |
| S5   | 3.389(2) | S4   | 3.497(2) |      |          |      |          |      |          |      |          |
| S3   | 3.505(2) | S8   | 3.548(3) |      |          |      |          |      |          |      |          |
| As3– |          | Sb3– |          | As5– |          | Ag5– |          | Pb6– |          | As6– |          |
| S10  | 2.232(3) | S10  | 2.439(8) | S9   | 2.230(5) | S10  | 2.670(4) | S4   | 2.733(3) | S5   | 2.343(7) |
| S5   | 2.272(3) | S5   | 2.456(9) | S9   | 2.433(5) | S9   | 2.713(6) | S6   | 2.831(3) | S4   | 2.543(6) |
| S8   | 2.528(4) | S9   | 2.476(7) | S10  | 2.473(3) | S3   | 2.721(5) | S9   | 2.890(3) | S6   | 2.714(6) |
| S9   | 2.865(4) | S8   | 2.938(7) | S5   | 2.906(4) | S6   | 2.783(5) | S5   | 2.912(3) | S10  | 2.880(5) |
| S7   | 3.566(3) | S7   | 3.264(7) | S3   | 3.227(6) | S5   | 2.786(3) | S10  | 2.930(3) | S9   | 2.984(6) |
|      |          | S7   | 3.474(8) |      |          | S9   | 2.871(5) | S10  | 3.092(3) |      |          |
|      |          |      |          |      |          |      |          | S8   | 3.444(3) |      |          |

**Table S3a.** Polyhedron characteristics for atoms in sample rath3.

| Site | Atom     | Occ.      | 1 | 2     | 3     | 4     | 5     | 6       | 7      | 8     | 9     | 10   |
|------|----------|-----------|---|-------|-------|-------|-------|---------|--------|-------|-------|------|
| Pb1  | (Pb,Tl)1 | 1         | 9 | 3.179 | 0.018 | 0.202 | 0.947 | 134.522 | 64.668 | 3.183 | 0.153 | 1.75 |
| Pb2  | (Pb,Tl)2 | 1         | 9 | 3.182 | 0.019 | 0.131 | 0.862 | 134.916 | 64.747 | 3.188 | 0.171 | 1.76 |
| As1  | As1      | 1         | 5 | 2.784 | 0.299 | 0.674 | 0.997 | 90.425  | 13.115 | 2.651 | 0.531 | 3.13 |
| As2  | As2      | 1         | 5 | 2.814 | 0.408 | 0.669 | 0.960 | 93.380  | 11.434 | 2.657 | 0.520 | 2.93 |
| Me3  | (As,Sb)3 | 0.90,0.10 | 5 | 2.896 | 0.465 | 0.672 | 0.934 | 101.776 | 11.260 | 2.673 | 0.482 | 2.63 |
| As4  | As4      | 1         | 5 | 2.828 | 0.334 | 0.683 | 0.982 | 94.697  | 13.042 | 2.667 | 0.538 | 3.01 |
| Me5a | As5      | 0.546     | 5 | 2.751 | 0.270 | 0.554 | 0.980 | 87.179  | 13.161 | 2.667 | 0.415 | 2.46 |
| Me5b | Ag5      | 0.454     | 6 | 2.762 | 0.059 | 0.030 | 0.976 | 88.256  | 26.436 | 2.762 | 0.028 | 1.15 |
| Me6  | (Pb,As)6 | 0.90,0.10 | 7 | 3.036 | 0.089 | 0.222 | 0.882 | 117.191 | 40.424 | 3.018 | 0.192 | 2.18 |

Notes: 1: coordination number, 2: radius  $r_s$  in Å of a circumscribed sphere least-squares fitted to the coordination polyhedron, 3: volume distortion  $v = [V(\text{ideal polyhedron}) - V(\text{real polyhedron})] / V(\text{ideal polyhedron})$ ; the ideal polyhedron has the same number of ligands, 4: 'volume-based' eccentricity  $ECC_v = 1 - [(r_s - \Delta) / r_s]^3$ ;  $\Delta$  is the distance between the center of the sphere and the central atom in the polyhedron, 5: 'volume-based' sphericity  $SPH_v = 1 - 3\sigma_{r_s}$ ;  $\sigma_r$  is the standard deviation of the radius  $r_s$ , 6: volume in Å<sup>3</sup> of the circumscribed sphere, 7: volume in Å<sup>3</sup> of coordination polyhedron, 8: average bond distance, 9: standard deviation of the bond distance, 10: bond-valence sum.

All values were calculated with IVTON (Balić Žunić & Vicković [29]; Makovicky & Balić Žunić [30]).

**Table S3b.** Polyhedron characteristics for atoms in sample rath4 (for explanation of header numbers see Table S3a).

| Site | Atom     | Occ.      | 1 | 2     | 3     | 4     | 5     | 6       | 7      | 8     | 9     | 10   |
|------|----------|-----------|---|-------|-------|-------|-------|---------|--------|-------|-------|------|
| Pb1  | (Pb,Tl)1 | 1         | 9 | 3.178 | 0.018 | 0.203 | 0.948 | 134.493 | 64.646 | 3.183 | 0.154 | 1.75 |
| Pb2  | (Pb,Tl)2 | 1         | 9 | 3.182 | 0.020 | 0.132 | 0.861 | 135.015 | 64.770 | 3.188 | 0.173 | 1.76 |
| As1  | As1      | 1         | 5 | 2.786 | 0.300 | 0.675 | 0.996 | 90.581  | 13.119 | 2.651 | 0.532 | 3.13 |
| As2  | As2      | 1         | 5 | 2.809 | 0.404 | 0.663 | 0.958 | 92.890  | 11.450 | 2.654 | 0.511 | 2.91 |
| Me3  | (As,Sb)3 | 0.92,0.08 | 5 | 2.900 | 0.466 | 0.672 | 0.932 | 102.146 | 11.282 | 2.675 | 0.482 | 2.62 |
| As4  | As4      | 1         | 5 | 2.827 | 0.331 | 0.683 | 0.979 | 94.654  | 13.087 | 2.667 | 0.539 | 3.02 |
| Me5a | As5      | 0.54      | 5 | 2.746 | 0.264 | 0.551 | 0.978 | 86.742  | 13.207 | 2.666 | 0.413 | 2.46 |
| Me5b | Ag5      | 0.46      | 6 | 2.758 | 0.057 | 0.031 | 0.974 | 87.877  | 26.370 | 2.759 | 0.031 | 1.16 |
| Me6  | (Pb,As)6 | 0.87,0.13 | 7 | 3.030 | 0.089 | 0.223 | 0.878 | 116.477 | 40.152 | 3.012 | 0.195 | 2.22 |

**Table S3c.** Polyhedron characteristics for atoms in sample rath5 (calculated from Berlepsch et al. [2]) (for explanation of header numbers see Table S3a).

| Site | Atom     | Occ.  | 1 | 2     | 3     | 4     | 5     | 6       | 7      | 8     | 9     | 10    |
|------|----------|-------|---|-------|-------|-------|-------|---------|--------|-------|-------|-------|
| Pb1  | (Pb,Tl)1 | 1     | 9 | 3.211 | 0.019 | 0.202 | 0.947 | 138.715 | 66.610 | 3.214 | 0.154 | 1.610 |
| Pb2  | (Pb,Tl)2 | 1     | 9 | 3.198 | 0.024 | 0.152 | 0.848 | 136.960 | 65.392 | 3.203 | 0.191 | 1.714 |
| As1  | As1      | 1     | 5 | 2.801 | 0.299 | 0.682 | 0.998 | 92.025  | 13.348 | 2.663 | 0.548 | 3.119 |
| As2  | As2      | 1     | 5 | 2.816 | 0.397 | 0.664 | 0.956 | 93.568  | 11.662 | 2.662 | 0.514 | 2.866 |
| Me3a | As3      | 0.735 | 5 | 2.919 | 0.464 | 0.684 | 0.930 | 104.230 | 11.545 | 2.683 | 0.492 | 2.618 |
| Me3b | Sb3      | 0.265 | 6 | 2.924 | 0.189 | 0.570 | 0.937 | 104.673 | 27.021 | 2.886 | 0.498 | 3.221 |
| As4  | As4      | 1     | 5 | 2.831 | 0.317 | 0.687 | 0.978 | 95.012  | 13.415 | 2.674 | 0.551 | 3.013 |
| Me5a | As5      | 0.526 | 5 | 2.753 | 0.254 | 0.554 | 0.981 | 87.400  | 13.478 | 2.670 | 0.417 | 2.446 |
| Me5b | Ag5      | 0.474 | 6 | 2.768 | 0.057 | 0.050 | 0.972 | 88.869  | 26.676 | 2.769 | 0.038 | 1.130 |
| Me6a | Pb6      | 0.739 | 7 | 3.015 | 0.094 | 0.251 | 0.861 | 114.813 | 39.382 | 2.996 | 0.221 | 2.374 |
| Me6b | As6      | 0.261 | 5 | 2.857 | 0.343 | 0.392 | 0.980 | 97.659  | 13.265 | 2.732 | 0.182 | 1.553 |

**Table S3d.** Polyhedron characteristics for atoms in sample rath7 (for explanation of header numbers see Table S3a).

| Site | Atom     | Occ.  | 1 | 2     | 3     | 4     | 5     | 6       | 7      | 8     | 9     | 10   |
|------|----------|-------|---|-------|-------|-------|-------|---------|--------|-------|-------|------|
| Pb1  | (Pb,Tl)1 | 1     | 9 | 3.225 | 0.019 | 0.207 | 0.948 | 140.461 | 67.396 | 3.226 | 0.156 | 1.56 |
| Pb2  | (Pb,Tl)2 | 1     | 9 | 3.204 | 0.028 | 0.180 | 0.838 | 137.786 | 65.517 | 3.211 | 0.211 | 1.71 |
| As1  | As1      | 1     | 5 | 2.810 | 0.299 | 0.685 | 0.998 | 92.961  | 13.465 | 2.670 | 0.557 | 3.11 |
| As2  | As2      | 1     | 5 | 2.808 | 0.383 | 0.663 | 0.955 | 92.745  | 11.834 | 2.659 | 0.513 | 2.88 |
| Me3a | As3      | 0.821 | 5 | 2.916 | 0.470 | 0.704 | 0.925 | 103.892 | 11.388 | 2.693 | 0.550 | 2.76 |
| Me3b | Sb3      | 0.179 | 6 | 3.044 | 0.269 | 0.649 | 0.891 | 118.161 | 27.480 | 2.841 | 0.455 | 3.39 |
| As4  | As4      | 1     | 5 | 2.821 | 0.305 | 0.683 | 0.977 | 94.037  | 13.517 | 2.668 | 0.549 | 3.05 |
| Me5a | As5      | 0.531 | 5 | 2.761 | 0.307 | 0.567 | 0.964 | 88.199  | 12.639 | 2.654 | 0.403 | 2.52 |
| Me5b | Ag5      | 0.469 | 6 | 2.760 | 0.060 | 0.120 | 0.968 | 88.032  | 26.341 | 2.757 | 0.071 | 1.18 |
| Me6a | Pb6      | 0.594 | 7 | 2.996 | 0.100 | 0.258 | 0.845 | 112.692 | 38.366 | 2.976 | 0.233 | 2.53 |
| Me6b | As6      | 0.406 | 5 | 2.831 | 0.349 | 0.478 | 0.981 | 95.084  | 12.798 | 2.693 | 0.257 | 1.88 |
